# Supplementary material for: Incorporated Biochar-Based Soil Amendment and Exogenous Glycine Betaine Foliar Application Ameliorate Rice (Oryza sativa L.) Tolerance and Resilience to Osmotic Stress
Source: MDPI journal article supplement (doi:10.3390/plants10091930), 2021-09-16
Supplement: s1 [file s1]

Supplementary materials

# Incorporated biochar-based soil amendment and exogenous glycine betaine foliar application ameliorate rice (*Oryza Sativa* L.) tolerance and resilience to osmotic stress

Emad M. Hafez <sup>1</sup>, Salah M. Gowayed <sup>2</sup>, Yasser Nehela <sup>3,4,\*</sup>, Raghda M. Sakran <sup>5</sup>, Asmaa M. S. Rady <sup>6</sup>, Abdelmoniem Awadalla <sup>7</sup>, Alaa El-Dein Omara <sup>8</sup>, Bassam F. Alowaiesh <sup>9</sup>

<sup>1</sup> Department of Agronomy, Faculty of Agriculture, Kafrelsheikh University, Kafr El-Sheikh 33516, Egypt; [emadhafez2012@agr.kfs.edu.eg](mailto:emadhafez2012@agr.kfs.edu.eg)

<sup>2</sup> Department of Botany, Faculty of Agriculture, Suez Canal University, Ismailia 41522, Egypt; [salahgowed@yahoo.com](mailto:salahgowed@yahoo.com)

<sup>3</sup> Department of Agricultural Botany, Faculty of Agriculture, Tanta University, Tanta 31527, Egypt; [yasser.nehela@ufl.edu](mailto:yasser.nehela@ufl.edu)

<sup>4</sup> Citrus Research and Education Center, Department of Plant Pathology, University of Florida, 700 Experiment Station Rd., Lake Alfred, FL 33850, USA

<sup>5</sup> Rice Research Department, Field Crops Research Institute, Agricultural Research Center, Egypt; [raghdasakran@yahoo.com](mailto:raghdasakran@yahoo.com)

<sup>6</sup> Crop Science Department, Faculty of Agriculture (EL-Shatby), Alexandria University, Alexandria 21545, Egypt; [asmaa.mohamed@alexu.edu.eg](mailto:asmaa.mohamed@alexu.edu.eg)

<sup>7</sup> Department of Agronomy, Faculty of Agriculture and Natural Resources, Aswan University, Aswan 81528, Egypt; [abdelmonemomr@yahoo.com](mailto:abdelmonemomr@yahoo.com)

<sup>8</sup> Department of Microbiology, Soils, Water and Environment Research Institute, Agricultural Research Center, Giza 12112, Egypt; [ala.omara@yahoo.com](mailto:ala.omara@yahoo.com)

<sup>9</sup> Olive Research Center, Jouf University, Sakaka, Aljouf 72341, Saudi Arabia; [olive@ju.edu.sa](mailto:olive@ju.edu.sa)

\* Correspondence: [yasser.nehela@ufl.edu](mailto:yasser.nehela@ufl.edu)

Table S1. Physico-chemical properties of biochar (rice husk and corn stalk [1:1]) used in the two successive seasons 2019 and 2020.

| Attribute                      | Biochar          | Unit                           |
|--------------------------------|------------------|--------------------------------|
| pH (1:5 biochar:water extract) | $7.60 \pm 0.02$  | -                              |
| EC (1:5 biochar:water extract) | $0.70 \pm 0.01$  | dS m <sup>-1</sup>             |
| CaCO <sub>3</sub>              | $1.4 \pm 0.03$   | %                              |
| bulk density                   | $0.20 \pm 0.03$  | g cm <sup>-3</sup>             |
| specific surface area          | $37.0 \pm 2.13$  | m <sup>2</sup> g <sup>-1</sup> |
| water holding capacity         | $350 \pm 12.23$  | %                              |
| moisture content               | $11.4 \pm 1.09$  | %                              |
| Nitrogen                       | $25.21 \pm 2.91$ | mg kg <sup>-1</sup>            |
| Phosphorus                     | $7.45 \pm 0.83$  | mg kg <sup>-1</sup>            |
| Potassium                      | $13.21 \pm 1.42$ | mg kg <sup>-1</sup>            |
| Sulfur                         | $90.25 \pm 5.35$ | mg kg <sup>-1</sup>            |
| Sodium                         | $8.36 \pm 0.89$  | mg kg <sup>-1</sup>            |
| Chloride                       | $35.47 \pm 2.02$ | mg kg <sup>-1</sup>            |

Table S2. Soil physicochemical attributes used in the two successive seasons 2019 and 2020.

| Season      | O.M<br>(%) | EC<br>(dS m <sup>-1</sup> ) | pH   | Cations (meq L <sup>-1</sup> ) |                |                  |                  | Anions (meq L <sup>-1</sup> ) |                               |                              |
|-------------|------------|-----------------------------|------|--------------------------------|----------------|------------------|------------------|-------------------------------|-------------------------------|------------------------------|
|             |            |                             |      | Na <sup>+</sup>                | K <sup>+</sup> | Mg <sup>++</sup> | Ca <sup>++</sup> | Cl <sup>-</sup>               | HCO <sub>3</sub> <sup>-</sup> | SO <sub>4</sub> <sup>-</sup> |
| <b>2019</b> | 1.38       | 5.84                        | 8.11 | 27.85                          | 0.37           | 6.45             | 9.78             | 24.65                         | 4.32                          | 15.22                        |
| <b>2020</b> | 1.42       | 5.73                        | 8.24 | 23.74                          | 0.36           | 5.75             | 7.55             | 18.47                         | 3.45                          | 11.25                        |

O.M = organic matter, EC= electrical conductivity
